# Supplementary material
Source: MDPI journal article supplement (https://www.mdpi.com/2311-7524/9/5/594)
Supplement: s1 [file s1]

**Table S1. Chemical properties of the Rhodic cambisol used in the study.**

| Cultivar (Cv.)          | pH(H <sub>2</sub> O) | pH(KCl)   | Organic matter % | P mg/100g  | K mg/100 g |
|-------------------------|----------------------|-----------|------------------|------------|------------|
| <i>Puntoža</i>          | 7.68±0.05            | 6.88±0.06 | 2.65±0.02        | 26.41±2.09 | 33.83±2.24 |
| <i>Buža</i>             | 7.84±0.07            | 6.91±0.04 | 2.65±0.06        | 23.05±2.68 | 30.50±1.04 |
| <i>Istarska bjelica</i> | 7.84±0.06            | 6.94±0.01 | 2.72±0.07        | 23.19±1.52 | 31.67±0.93 |
| <i>Karbonaca</i>        | 7.74±0.08            | 6.88±0.06 | 2.71±0.11        | 23.45±2.46 | 32.50±1.15 |
| <i>Leccino</i>          | 7.89±0.03            | 6.90±0.04 | 2.45±0.19        | 21.93±1.41 | 29.50±0.58 |
| <i>Rošinjola</i>        | 7.72±0.08            | 6.84±0.05 | 2.61±0.05        | 25.71±1.21 | 32.50±2.18 |
| <i>p-value</i>          | 0.245                | 0.798     | 0.487            | 0.591      | 0.417      |

Results are expressed as means ± standard errors (n=3). Different lowercase letters in a column represent statistically significant differences between mean values for each cultivar at  $p < 0.05$  obtained by a one-way ANOVA and Tukey's test.

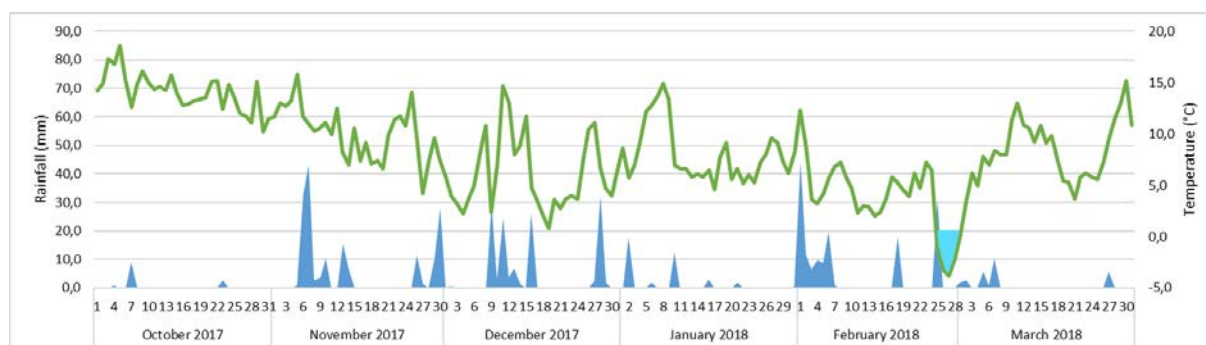

**Figure S1. Average daily temperatures (°C) and rainfall (mm) measured in the sampling period from the beginning of October 2017 until the end of March 2018 in Poreč, Istria, Croatia.**

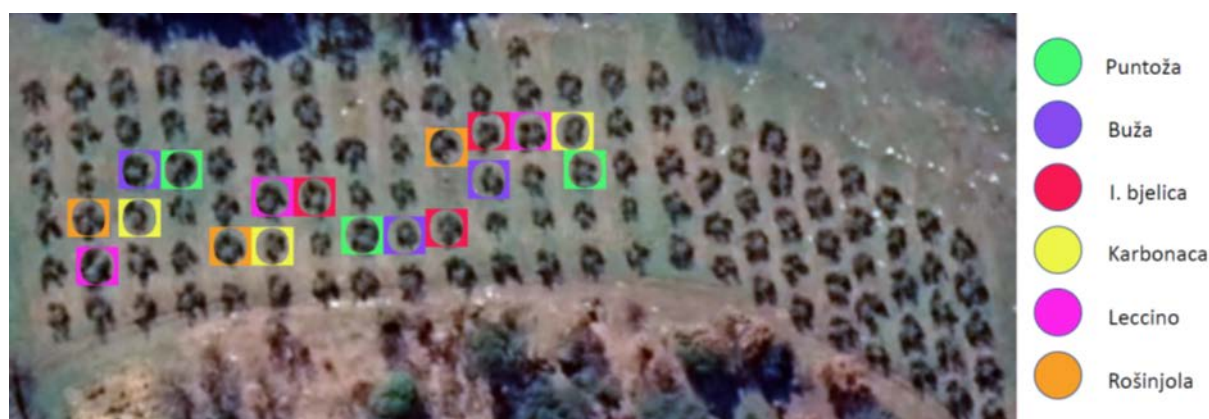

**Photo S1. Experiment design scheme.**
